# Supplementary material
Source: publisher figshare collection journal article supplement (https://acs.figshare.com/ndownloader/files/3928828)
Supplement: Supplementary file 1 [file 3928828]

 
data_mo_2014053_0m 
 
_audit_creation_method            SHELXL-97 
_chemical_name_systematic 
; 
 ? 
; 
_chemical_name_common             ? 
_chemical_melting_point           ? 
_chemical_formula_moiety          ? 
_chemical_formula_sum 
 'C19 H20 O4' 
_chemical_formula_weight          312.35 
 _chemical_absolute_configuration unk
 
loop_ 
 _atom_type_symbol 
 _atom_type_description 
 _atom_type_scat_dispersion_real 
 _atom_type_scat_dispersion_imag 
 _atom_type_scat_source 
 'C'  'C'   0.0033   0.0016 
 'International Tables Vol C Tables 4.2.6.8 and 6.1.1.4' 
 'H'  'H'   0.0000   0.0000 
 'International Tables Vol C Tables 4.2.6.8 and 6.1.1.4' 
 'O'  'O'   0.0106   0.0060 
 'International Tables Vol C Tables 4.2.6.8 and 6.1.1.4' 
 
_symmetry_cell_setting            ? 
_symmetry_space_group_name_H-M    P212121 
 
loop_ 
 _symmetry_equiv_pos_as_xyz 
 'x, y, z' 
 'x+1/2, -y+1/2, -z' 
 '-x, y+1/2, -z+1/2' 
 '-x+1/2, -y, z+1/2' 
 
_cell_length_a                    9.5536(9) 
_cell_length_b                    9.8415(11) 
_cell_length_c                    17.0212(17) 
_cell_angle_alpha                 90.00 
_cell_angle_beta                  90.00 
_cell_angle_gamma                 90.00 
_cell_volume                      1600.4(3) 
_cell_formula_units_Z             4 
_cell_measurement_temperature     296(2) 
_cell_measurement_reflns_used     ? 
_cell_measurement_theta_min       ? 
_cell_measurement_theta_max       ? 
 
_exptl_crystal_description        ? 
_exptl_crystal_colour             ? 
_exptl_crystal_size_max           1.00 
_exptl_crystal_size_mid           0.40 
_exptl_crystal_size_min           0.40 
_exptl_crystal_density_meas       ? 
_exptl_crystal_density_diffrn     1.296 
_exptl_crystal_density_method     'not measured' 
_exptl_crystal_F_000              664 
_exptl_absorpt_coefficient_mu     0.090 
_exptl_absorpt_correction_type    ? 
_exptl_absorpt_correction_T_min   0.9152 
_exptl_absorpt_correction_T_max   0.9648 
_exptl_absorpt_process_details    ? 
 
_exptl_special_details 
; 
 ? 
; 
 
_diffrn_ambient_temperature       296(2) 
_diffrn_radiation_wavelength      0.71073 
_diffrn_radiation_type            MoK\a 
_diffrn_radiation_source          'fine-focus sealed tube' 
_diffrn_radiation_monochromator   graphite 
_diffrn_measurement_device_type   ? 
_diffrn_measurement_method        ? 
_diffrn_detector_area_resol_mean  ? 
_diffrn_reflns_number             7808 
_diffrn_reflns_av_R_equivalents   0.0239 
_diffrn_reflns_av_sigmaI/netI     0.0301 
_diffrn_reflns_limit_h_min        -12 
_diffrn_reflns_limit_h_max        12 
_diffrn_reflns_limit_k_min        -12 
_diffrn_reflns_limit_k_max        12 
_diffrn_reflns_limit_l_min        -21 
_diffrn_reflns_limit_l_max        22 
_diffrn_reflns_theta_min          2.39 
_diffrn_reflns_theta_max          27.48 
_reflns_number_total              3633 
_reflns_number_gt                 3300 
_reflns_threshold_expression      >2sigma(I) 
 
_computing_data_collection        ? 
_computing_cell_refinement        ? 
_computing_data_reduction         ? 
_computing_structure_solution     'SHELXS-97 (Sheldrick, 2008)' 
_computing_structure_refinement   'SHELXL-97 (Sheldrick, 2008)' 
_computing_molecular_graphics     ? 
_computing_publication_material   ? 
 
_refine_special_details 
; 
 Refinement of F^2^ against ALL reflections.  The weighted R-factor wR and 
 goodness of fit S are based on F^2^, conventional R-factors R are based 
 on F, with F set to zero for negative F^2^. The threshold expression of 
 F^2^ > 2sigma(F^2^) is used only for calculating R-factors(gt) etc. and is 
 not relevant to the choice of reflections for refinement.  R-factors based 
 on F^2^ are statistically about twice as large as those based on F, and R- 
 factors based on ALL data will be even larger. 
; 
 
_refine_ls_structure_factor_coef  Fsqd  
_refine_ls_matrix_type            full 
_refine_ls_weighting_scheme       calc  
_refine_ls_weighting_details 
 'calc w=1/[\s^2^(Fo^2^)+(0.0414P)^2^+0.1551P] where P=(Fo^2^+2Fc^2^)/3' 
_atom_sites_solution_primary      direct 
_atom_sites_solution_secondary    difmap 
_atom_sites_solution_hydrogens    geom 
_refine_ls_hydrogen_treatment     mixed 
_refine_ls_extinction_method      SHELXL 
_refine_ls_extinction_coef        0.045(3) 
_refine_ls_extinction_expression 
 'Fc^*^=kFc[1+0.001xFc^2^\l^3^/sin(2\q)]^-1/4^' 
_refine_ls_abs_structure_details 
 'Flack H D (1983), Acta Cryst. A39, 876-881' 
_refine_ls_abs_structure_Flack    -0.4(8) 
_refine_ls_number_reflns          3633 
_refine_ls_number_parameters      214 
_refine_ls_number_restraints      0 
_refine_ls_R_factor_all           0.0373 
_refine_ls_R_factor_gt            0.0324 
_refine_ls_wR_factor_ref          0.0851 
_refine_ls_wR_factor_gt           0.0817 
_refine_ls_goodness_of_fit_ref    1.041 
_refine_ls_restrained_S_all       1.041 
_refine_ls_shift/su_max           0.000 
_refine_ls_shift/su_mean          0.000 
 
loop_ 
 _atom_site_label 
 _atom_site_type_symbol 
 _atom_site_fract_x 
 _atom_site_fract_y 
 _atom_site_fract_z 
 _atom_site_U_iso_or_equiv 
 _atom_site_adp_type 
 _atom_site_occupancy 
 _atom_site_symmetry_multiplicity 
 _atom_site_calc_flag 
 _atom_site_refinement_flags 
 _atom_site_disorder_assembly 
 _atom_site_disorder_group 
O4 O 0.43583(12) -0.02033(17) 0.21823(7) 0.0740(4) Uani 1 1 d . . . 
O2 O 0.94362(10) 0.05121(10) -0.01917(5) 0.0408(2) Uani 1 1 d . . . 
O3 O 0.96695(10) 0.27889(10) 0.06569(5) 0.0387(2) Uani 1 1 d . . . 
H8 H 0.906(2) 0.2481(19) 0.0302(11) 0.058 Uiso 1 1 d . . . 
O1 O 1.25096(9) 0.15633(12) 0.04001(6) 0.0491(3) Uani 1 1 d . . . 
C13 C 0.4448(2) -0.0437(3) 0.30037(11) 0.0895(8) Uani 1 1 d . . . 
H20 H 0.4541 -0.1394 0.3100 0.134 Uiso 1 1 calc R . . 
H3 H 0.3615 -0.0107 0.3255 0.134 Uiso 1 1 calc R . . 
H1 H 0.5248 0.0030 0.3212 0.134 Uiso 1 1 calc R . . 
C10 C 0.55518(15) -0.04004(18) 0.17431(9) 0.0504(4) Uani 1 1 d . . . 
C11 C 0.66116(17) -0.12870(19) 0.19530(10) 0.0555(4) Uani 1 1 d . . . 
H4 H 0.6524 -0.1820 0.2401 0.067 Uiso 1 1 calc R . . 
C12 C 0.78007(16) -0.13778(16) 0.14947(9) 0.0490(4) Uani 1 1 d . . . 
H5 H 0.8509 -0.1978 0.1637 0.059 Uiso 1 1 calc R . . 
C7 C 0.79555(14) -0.05850(14) 0.08226(8) 0.0378(3) Uani 1 1 d . . . 
C5 C 0.92867(15) -0.06178(14) 0.03583(8) 0.0398(3) Uani 1 1 d . . . 
C2 C 1.03686(13) 0.04370(14) 0.04720(7) 0.0355(3) Uani 1 1 d . . . 
C3 C 1.03139(13) 0.16781(13) 0.10423(7) 0.0318(3) Uani 1 1 d . . . 
C14 C 0.96782(13) 0.14269(12) 0.18505(7) 0.0323(3) Uani 1 1 d . . . 
C15 C 1.02968(16) 0.05254(15) 0.23775(8) 0.0420(3) Uani 1 1 d . . . 
H13 H 1.1090 0.0043 0.2228 0.050 Uiso 1 1 calc R . . 
C16 C 0.97438(19) 0.03388(17) 0.31222(9) 0.0520(4) Uani 1 1 d . . . 
H14 H 1.0171 -0.0260 0.3470 0.062 Uiso 1 1 calc R . . 
C17 C 0.8566(2) 0.10377(18) 0.33476(9) 0.0554(4) Uani 1 1 d . . . 
H2 H 0.8196 0.0914 0.3848 0.066 Uiso 1 1 calc R . . 
C8 C 0.68604(14) 0.02565(15) 0.06052(8) 0.0411(3) Uani 1 1 d . . . 
H6 H 0.6933 0.0773 0.0149 0.049 Uiso 1 1 calc R . . 
C9 C 0.56561(14) 0.03389(17) 0.10587(9) 0.0470(3) Uani 1 1 d . . . 
H7 H 0.4920 0.0893 0.0901 0.056 Uiso 1 1 calc R . . 
C4 C 1.18835(13) 0.20290(16) 0.11077(8) 0.0416(3) Uani 1 1 d . . . 
H11 H 1.2011 0.3002 0.1165 0.050 Uiso 1 1 calc R . . 
H12 H 1.2297 0.1578 0.1558 0.050 Uiso 1 1 calc R . . 
C1 C 1.19149(15) 0.02561(16) 0.02787(9) 0.0491(4) Uani 1 1 d . . . 
H10 H 1.2342 -0.0410 0.0623 0.059 Uiso 1 1 calc R . . 
H9 H 1.2037 -0.0034 -0.0262 0.059 Uiso 1 1 calc R . . 
C19 C 0.84886(15) 0.21203(15) 0.20868(8) 0.0420(3) Uani 1 1 d . . . 
H16 H 0.8059 0.2725 0.1743 0.050 Uiso 1 1 calc R . . 
C18 C 0.79314(18) 0.19227(18) 0.28311(10) 0.0537(4) Uani 1 1 d . . . 
H15 H 0.7128 0.2389 0.2982 0.064 Uiso 1 1 calc R . . 
C6 C 0.9687(2) -0.19905(16) 0.00197(11) 0.0599(4) Uani 1 1 d . . . 
H19 H 0.8964 -0.2296 -0.0330 0.090 Uiso 1 1 calc R . . 
H17 H 0.9798 -0.2634 0.0439 0.090 Uiso 1 1 calc R . . 
H18 H 1.0551 -0.1909 -0.0264 0.090 Uiso 1 1 calc R . . 
 
loop_ 
 _atom_site_aniso_label 
 _atom_site_aniso_U_11 
 _atom_site_aniso_U_22 
 _atom_site_aniso_U_33 
 _atom_site_aniso_U_23 
 _atom_site_aniso_U_13 
 _atom_site_aniso_U_12 
O4 0.0466(6) 0.1234(12) 0.0519(6) 0.0173(7) 0.0061(5) -0.0097(7) 
O2 0.0462(5) 0.0465(5) 0.0298(4) 0.0001(4) -0.0033(4) 0.0009(4) 
O3 0.0458(5) 0.0350(5) 0.0353(4) 0.0053(4) -0.0080(4) 0.0026(4) 
O1 0.0357(5) 0.0621(7) 0.0495(6) 0.0057(5) 0.0089(4) -0.0019(5) 
C13 0.0657(11) 0.153(2) 0.0493(10) 0.0116(12) 0.0083(9) -0.0275(15) 
C10 0.0380(6) 0.0703(10) 0.0429(7) 0.0081(8) -0.0051(6) -0.0157(7) 
C11 0.0528(8) 0.0657(10) 0.0481(8) 0.0237(8) -0.0082(7) -0.0153(8) 
C12 0.0496(8) 0.0453(8) 0.0522(8) 0.0147(7) -0.0120(7) -0.0044(7) 
C7 0.0401(6) 0.0351(6) 0.0381(6) 0.0006(5) -0.0088(5) -0.0062(6) 
C5 0.0457(7) 0.0369(7) 0.0368(6) -0.0011(6) -0.0061(5) 0.0030(6) 
C2 0.0357(6) 0.0410(7) 0.0298(5) 0.0002(5) 0.0005(5) 0.0050(6) 
C3 0.0306(5) 0.0344(6) 0.0302(6) 0.0025(5) -0.0010(5) 0.0009(5) 
C14 0.0357(6) 0.0308(6) 0.0305(6) -0.0001(5) -0.0005(5) -0.0046(5) 
C15 0.0493(7) 0.0388(7) 0.0381(6) 0.0047(6) -0.0008(6) 0.0010(7) 
C16 0.0699(10) 0.0485(8) 0.0377(7) 0.0096(6) -0.0044(7) -0.0072(8) 
C17 0.0746(11) 0.0561(9) 0.0354(7) 0.0004(7) 0.0130(7) -0.0161(8) 
C8 0.0408(6) 0.0467(8) 0.0358(6) 0.0083(6) -0.0065(5) -0.0036(6) 
C9 0.0368(6) 0.0598(9) 0.0442(7) 0.0080(7) -0.0069(6) -0.0014(7) 
C4 0.0332(6) 0.0520(8) 0.0397(7) 0.0051(6) -0.0028(5) -0.0046(6) 
C1 0.0398(7) 0.0569(9) 0.0507(8) -0.0015(7) 0.0080(6) 0.0100(7) 
C19 0.0407(7) 0.0414(7) 0.0437(7) 0.0017(6) 0.0053(6) 0.0021(6) 
C18 0.0547(8) 0.0546(9) 0.0518(8) -0.0041(8) 0.0178(7) -0.0010(8) 
C6 0.0727(10) 0.0450(8) 0.0619(10) -0.0131(8) -0.0052(9) 0.0066(8) 
 
_geom_special_details 
; 
 All esds (except the esd in the dihedral angle between two l.s. planes) 
 are estimated using the full covariance matrix.  The cell esds are taken 
 into account individually in the estimation of esds in distances, angles 
 and torsion angles; correlations between esds in cell parameters are only 
 used when they are defined by crystal symmetry.  An approximate (isotropic) 
 treatment of cell esds is used for estimating esds involving l.s. planes. 
; 
 
loop_ 
 _geom_bond_atom_site_label_1 
 _geom_bond_atom_site_label_2 
 _geom_bond_distance 
 _geom_bond_site_symmetry_2 
 _geom_bond_publ_flag 
O4 C10 1.3772(19) . ? 
O4 C13 1.420(2) . ? 
O2 C2 1.4405(15) . ? 
O2 C5 1.4606(17) . ? 
O3 C3 1.4158(15) . ? 
O3 H8 0.89(2) . ? 
O1 C1 1.421(2) . ? 
O1 C4 1.4208(17) . ? 
C13 H20 0.9600 . ? 
C13 H3 0.9600 . ? 
C13 H1 0.9600 . ? 
C10 C9 1.377(2) . ? 
C10 C11 1.383(2) . ? 
C11 C12 1.381(2) . ? 
C11 H4 0.9300 . ? 
C12 C7 1.3925(19) . ? 
C12 H5 0.9300 . ? 
C7 C8 1.3847(19) . ? 
C7 C5 1.4977(19) . ? 
C5 C2 1.478(2) . ? 
C5 C6 1.518(2) . ? 
C2 C1 1.5239(18) . ? 
C2 C3 1.5610(18) . ? 
C3 C14 1.5239(17) . ? 
C3 C4 1.5428(18) . ? 
C14 C19 1.3853(19) . ? 
C14 C15 1.3932(18) . ? 
C15 C16 1.385(2) . ? 
C15 H13 0.9300 . ? 
C16 C17 1.374(3) . ? 
C16 H14 0.9300 . ? 
C17 C18 1.378(3) . ? 
C17 H2 0.9300 . ? 
C8 C9 1.388(2) . ? 
C8 H6 0.9300 . ? 
C9 H7 0.9300 . ? 
C4 H11 0.9700 . ? 
C4 H12 0.9700 . ? 
C1 H10 0.9700 . ? 
C1 H9 0.9700 . ? 
C19 C18 1.388(2) . ? 
C19 H16 0.9300 . ? 
C18 H15 0.9300 . ? 
C6 H19 0.9600 . ? 
C6 H17 0.9600 . ? 
C6 H18 0.9600 . ? 
 
loop_ 
 _geom_angle_atom_site_label_1 
 _geom_angle_atom_site_label_2 
 _geom_angle_atom_site_label_3 
 _geom_angle 
 _geom_angle_site_symmetry_1 
 _geom_angle_site_symmetry_3 
 _geom_angle_publ_flag 
C10 O4 C13 117.50(15) . . ? 
C2 O2 C5 61.23(8) . . ? 
C3 O3 H8 109.5(12) . . ? 
C1 O1 C4 104.29(10) . . ? 
O4 C13 H20 109.5 . . ? 
O4 C13 H3 109.5 . . ? 
H20 C13 H3 109.5 . . ? 
O4 C13 H1 109.5 . . ? 
H20 C13 H1 109.5 . . ? 
H3 C13 H1 109.5 . . ? 
O4 C10 C9 116.40(15) . . ? 
O4 C10 C11 123.69(14) . . ? 
C9 C10 C11 119.92(15) . . ? 
C12 C11 C10 119.80(14) . . ? 
C12 C11 H4 120.1 . . ? 
C10 C11 H4 120.1 . . ? 
C11 C12 C7 121.01(14) . . ? 
C11 C12 H5 119.5 . . ? 
C7 C12 H5 119.5 . . ? 
C8 C7 C12 118.32(13) . . ? 
C8 C7 C5 120.89(12) . . ? 
C12 C7 C5 120.77(12) . . ? 
O2 C5 C2 58.71(8) . . ? 
O2 C5 C7 113.88(11) . . ? 
C2 C5 C7 120.65(11) . . ? 
O2 C5 C6 114.19(12) . . ? 
C2 C5 C6 119.94(13) . . ? 
C7 C5 C6 115.68(13) . . ? 
O2 C2 C5 60.05(8) . . ? 
O2 C2 C1 115.86(11) . . ? 
C5 C2 C1 124.59(12) . . ? 
O2 C2 C3 115.27(10) . . ? 
C5 C2 C3 127.42(11) . . ? 
C1 C2 C3 104.96(11) . . ? 
O3 C3 C14 111.73(10) . . ? 
O3 C3 C4 106.46(11) . . ? 
C14 C3 C4 111.01(10) . . ? 
O3 C3 C2 109.30(9) . . ? 
C14 C3 C2 116.60(10) . . ? 
C4 C3 C2 100.81(10) . . ? 
C19 C14 C15 118.34(12) . . ? 
C19 C14 C3 120.60(11) . . ? 
C15 C14 C3 121.03(11) . . ? 
C16 C15 C14 120.78(14) . . ? 
C16 C15 H13 119.6 . . ? 
C14 C15 H13 119.6 . . ? 
C17 C16 C15 120.10(15) . . ? 
C17 C16 H14 120.0 . . ? 
C15 C16 H14 120.0 . . ? 
C16 C17 C18 119.91(14) . . ? 
C16 C17 H2 120.0 . . ? 
C18 C17 H2 120.0 . . ? 
C7 C8 C9 120.84(13) . . ? 
C7 C8 H6 119.6 . . ? 
C9 C8 H6 119.6 . . ? 
C10 C9 C8 119.97(14) . . ? 
C10 C9 H7 120.0 . . ? 
C8 C9 H7 120.0 . . ? 
O1 C4 C3 106.01(11) . . ? 
O1 C4 H11 110.5 . . ? 
C3 C4 H11 110.5 . . ? 
O1 C4 H12 110.5 . . ? 
C3 C4 H12 110.5 . . ? 
H11 C4 H12 108.7 . . ? 
O1 C1 C2 104.50(11) . . ? 
O1 C1 H10 110.9 . . ? 
C2 C1 H10 110.9 . . ? 
O1 C1 H9 110.9 . . ? 
C2 C1 H9 110.9 . . ? 
H10 C1 H9 108.9 . . ? 
C14 C19 C18 120.71(14) . . ? 
C14 C19 H16 119.6 . . ? 
C18 C19 H16 119.6 . . ? 
C17 C18 C19 120.15(15) . . ? 
C17 C18 H15 119.9 . . ? 
C19 C18 H15 119.9 . . ? 
C5 C6 H19 109.5 . . ? 
C5 C6 H17 109.5 . . ? 
H19 C6 H17 109.5 . . ? 
C5 C6 H18 109.5 . . ? 
H19 C6 H18 109.5 . . ? 
H17 C6 H18 109.5 . . ? 
 
loop_ 
 _geom_torsion_atom_site_label_1 
 _geom_torsion_atom_site_label_2 
 _geom_torsion_atom_site_label_3 
 _geom_torsion_atom_site_label_4 
 _geom_torsion 
 _geom_torsion_site_symmetry_1 
 _geom_torsion_site_symmetry_2 
 _geom_torsion_site_symmetry_3 
 _geom_torsion_site_symmetry_4 
 _geom_torsion_publ_flag 
C13 O4 C10 C9 -153.21(19) . . . . ? 
C13 O4 C10 C11 27.1(3) . . . . ? 
O4 C10 C11 C12 -177.20(15) . . . . ? 
C9 C10 C11 C12 3.1(3) . . . . ? 
C10 C11 C12 C7 0.2(3) . . . . ? 
C11 C12 C7 C8 -2.7(2) . . . . ? 
C11 C12 C7 C5 175.81(14) . . . . ? 
C2 O2 C5 C7 112.53(12) . . . . ? 
C2 O2 C5 C6 -111.55(14) . . . . ? 
C8 C7 C5 O2 14.22(18) . . . . ? 
C12 C7 C5 O2 -164.30(12) . . . . ? 
C8 C7 C5 C2 80.78(16) . . . . ? 
C12 C7 C5 C2 -97.74(16) . . . . ? 
C8 C7 C5 C6 -121.02(15) . . . . ? 
C12 C7 C5 C6 60.46(18) . . . . ? 
C5 O2 C2 C1 116.67(14) . . . . ? 
C5 O2 C2 C3 -120.24(12) . . . . ? 
C7 C5 C2 O2 -100.99(13) . . . . ? 
C6 C5 C2 O2 101.73(14) . . . . ? 
O2 C5 C2 C1 -102.36(14) . . . . ? 
C7 C5 C2 C1 156.65(12) . . . . ? 
C6 C5 C2 C1 -0.6(2) . . . . ? 
O2 C5 C2 C3 100.34(13) . . . . ? 
C7 C5 C2 C3 -0.7(2) . . . . ? 
C6 C5 C2 C3 -157.93(13) . . . . ? 
O2 C2 C3 O3 -17.72(14) . . . . ? 
C5 C2 C3 O3 -88.22(15) . . . . ? 
C1 C2 C3 O3 110.98(12) . . . . ? 
O2 C2 C3 C14 110.16(12) . . . . ? 
C5 C2 C3 C14 39.67(17) . . . . ? 
C1 C2 C3 C14 -121.14(12) . . . . ? 
O2 C2 C3 C4 -129.59(11) . . . . ? 
C5 C2 C3 C4 159.91(12) . . . . ? 
C1 C2 C3 C4 -0.89(13) . . . . ? 
O3 C3 C14 C19 8.35(16) . . . . ? 
C4 C3 C14 C19 127.01(13) . . . . ? 
C2 C3 C14 C19 -118.35(13) . . . . ? 
O3 C3 C14 C15 -169.89(11) . . . . ? 
C4 C3 C14 C15 -51.23(16) . . . . ? 
C2 C3 C14 C15 63.42(15) . . . . ? 
C19 C14 C15 C16 -0.7(2) . . . . ? 
C3 C14 C15 C16 177.59(13) . . . . ? 
C14 C15 C16 C17 0.5(2) . . . . ? 
C15 C16 C17 C18 0.2(2) . . . . ? 
C12 C7 C8 C9 1.9(2) . . . . ? 
C5 C7 C8 C9 -176.61(13) . . . . ? 
O4 C10 C9 C8 176.39(15) . . . . ? 
C11 C10 C9 C8 -3.9(2) . . . . ? 
C7 C8 C9 C10 1.4(2) . . . . ? 
C1 O1 C4 C3 -44.03(13) . . . . ? 
O3 C3 C4 O1 -87.59(13) . . . . ? 
C14 C3 C4 O1 150.61(11) . . . . ? 
C2 C3 C4 O1 26.44(13) . . . . ? 
C4 O1 C1 C2 42.59(13) . . . . ? 
O2 C2 C1 O1 103.65(13) . . . . ? 
C5 C2 C1 O1 173.79(12) . . . . ? 
C3 C2 C1 O1 -24.70(14) . . . . ? 
C15 C14 C19 C18 0.2(2) . . . . ? 
C3 C14 C19 C18 -178.10(14) . . . . ? 
C16 C17 C18 C19 -0.7(3) . . . . ? 
C14 C19 C18 C17 0.5(2) . . . . ? 
 
_diffrn_measured_fraction_theta_max    0.996 
_diffrn_reflns_theta_full              27.48 
_diffrn_measured_fraction_theta_full   0.996 
_refine_diff_density_max    0.186 
_refine_diff_density_min   -0.118 
_refine_diff_density_rms    0.027 
